# Supplementary material for: B,N-Co-doped graphene quantum dots as fluorescence sensor for detection of Hg2+ and F− ions
Source: Royal Society of Chemistry journal article supplement (doi:10.1039/c9ay00249a), 2019-01-01
Supplement: c9ay00249a1.pdf [file c9ay00249a1.pdf]

## B, N-Co-doped Graphene Quantum Dots as Fluorescence Sensor for Detection of $\text{Hg}^{2+}$ and $\text{F}^-$ Ions

Panxing Yang, Jie Su, Ruiwei Guo, Fanglian Yao, Caideng Yuan\*

### Supporting Information

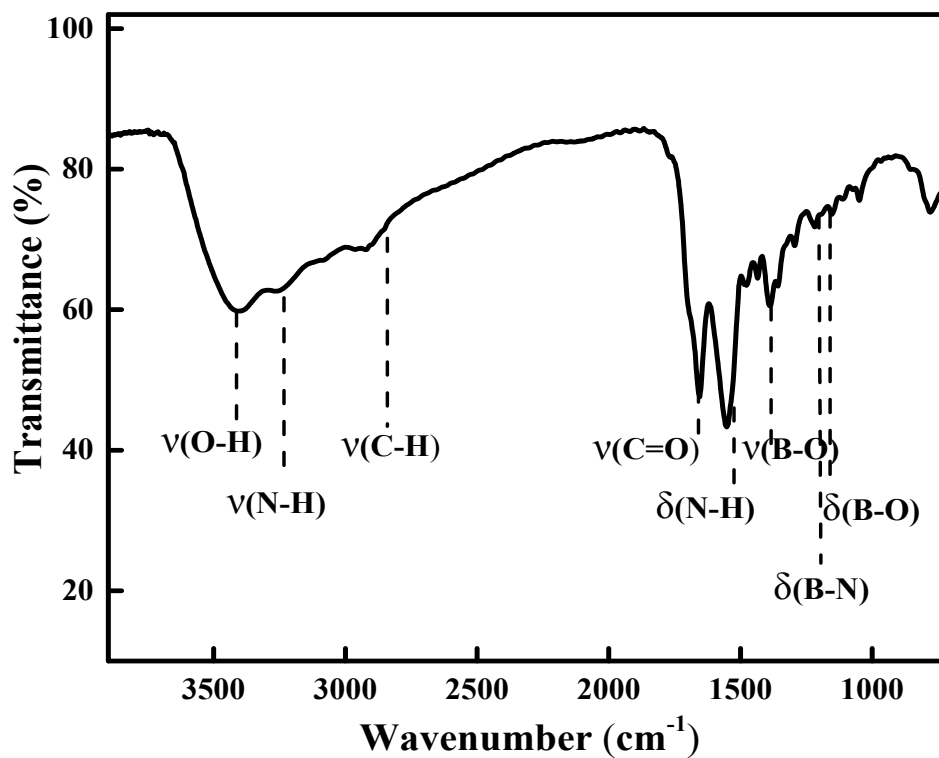

Figure S1. FTIR spectrum of B, N-GQDs.

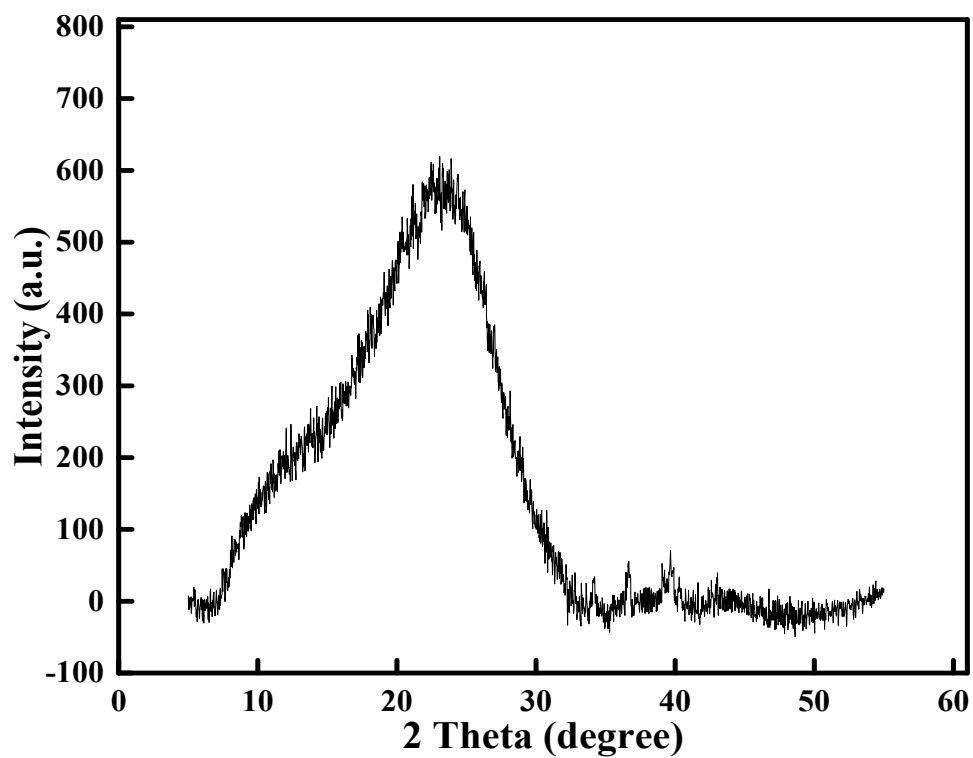

Figure S2. XRD pattern of B, N-GQDs.

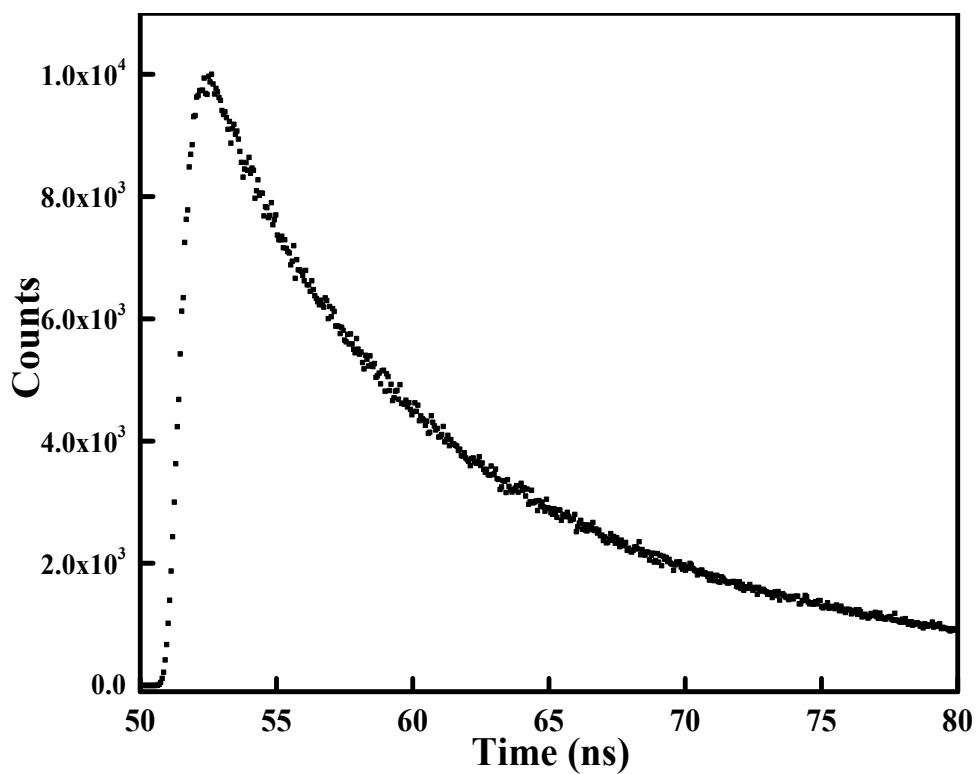

Figure S3. Time-resolved fluorescence decay curve of B, N-GQDs.

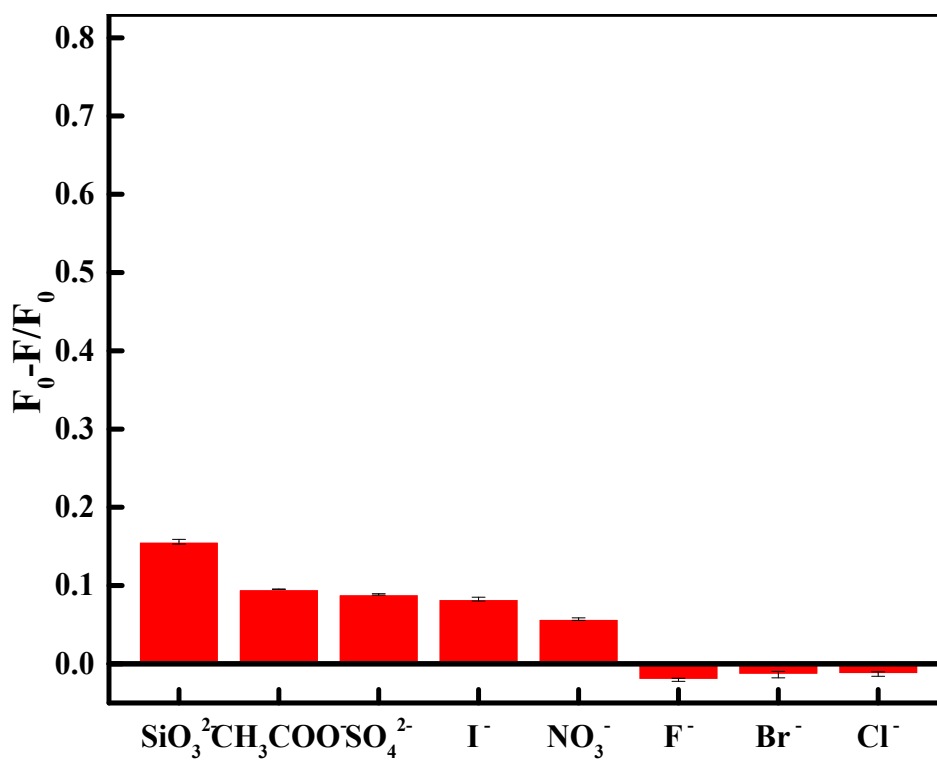

Figure. S4. Effect of anions on fluorescence intensity of B, N-GQDs (each at a concentration of 10 mM)

Table. S1. Relative quantum yield of GQDs using quinine sulfate as a reference

| Sample          | Abs. at 350 nm | Integrated PL intensity | Quantum yield (%) |
|-----------------|----------------|-------------------------|-------------------|
| Quinine Sulfate | 0.0527         | 9605                    | 54                |
| B, N-GQDs       | 0.0473         | 11913                   | 75                |
| N-GQDs          | 0.0581         | 14020                   | 71                |
| B-GQDs          | 0.0183         | 1455                    | 23                |
